# Supplementary material
Source: MDPI journal article supplement (https://www.mdpi.com/2073-4395/8/10/232)
Supplement: s1 [file s1]

## Sheet: Sheet1
Table S1: Data of specific combining ability of sixty one-way F1 hybrids under normal and water stress environment.
Crosses	Number of leaves	Leaf area	Specific leaf weight	Leaf area index	Leaf water potential	Relative leaf water content	Photosynthetic efficiency	Proline content	Biological yield	Harvest index	Seed yield	Oil content
SCA Under Non-stressed Enviorment
CMS-XA × RCR-8297	-0.92	-0.15	-0.35	-0.85	-0.13	8.73**	1.06*	-0.11	38.77**	0.16	-2.14	-0.87
CMS-XA × P69R	-1.61	0.23**	0.67**	1.25**	-0.22	0.62	2.33**	0.18**	-102.23	0.82	-9.1	3.65**
CMS-XA × P124R	0.73**	0.03**	0.02	0.18**	0.20**	-1.73	-1.84	-0.13	84.12**	-1.42	4.76**	-0.96
CMS-XA × P100R	1.80**	-0.11	-0.34	-0.58	0.16**	-7.62	-1.55	0.06**	-20.67	0.44	6.47**	-1.83
CMS-E002-91A × RCR-8297	0.35	-0.1	-0.26	-0.58	-0.1	-0.86	-0.5	0.09**	-95.6	4.19**	0.66	-3.24
CMS-E002-91A × P69R	0.09	0.14**	0.26**	0.78**	-0.05	5.77**	-0.01	-0.14	49.55**	-1.13	2.03	-0.85
CMS-E002-91A × P124R	-0.37	-0.07	-0.13	-0.39	0.04	-1.26	-1.45	-0.03	49.34**	-1.74	0.64	2.11**
CMS-E002-91A × P100R	-0.08	0.03**	0.13**	0.19**	0.11**	-3.64	1.97**	0.08**	-3.29	-1.32	-3.32	1.98**
CMS-PKU-2A × RCR-8297	1.90**	-0.1	-0.39	-0.58	-0.45	5.44**	-0.06	-0.06	-83.32	3.06**	-7.07	-1.09
CMS-PKU-2A × P69R	-0.84	-0.05	-0.09	-0.25	-0.14	10.12**	-4.37	-0.03	-18.93	-3.73	-5.78	1.38**
CMS-PKU-2A × P124R	-0.25	0.05**	0.14**	0.28**	0.32**	-8.17	-1.42	0.07**	53.53**	1.88**	8.31**	-0.05
CMS-PKU-2A × P100R	-0.81	0.09**	0.34**	0.55**	0.27**	-7.39	5.85**	0.03**	48.73**	-1.21	4.54**	-0.24
CMS-ARG-2A × RCR-8297	1.27**	0.42**	0.88**	2.25**	0.35**	1.93**	-3.2	-0.01	8.4	5.36**	13.28**	0.60**
CMS-ARG-2A × P69R	-0.99	-0.22	-0.47	-1.23	-0.13	-13.46	1.23**	-0.08	-100.04	-3.67	-18.75	-1.54
CMS-ARG-2A × P124R	0.35	-0.04	-0.1	-0.2	-0.49	1.29**	0.22	0.13**	37.68**	-3.17	-4.51	1.08**
CMS-ARG-2A × P100R	-0.64	-0.15	-0.32	-0.82	0.27**	10.24**	1.75**	-0.05	53.95**	1.48**	9.97**	-0.14
CMS-ARG-3A × RCR-8297	-1.49	0.10**	0.32**	0.49**	-0.05	-5.52	0.51	0.07**	65.18**	-8.01	-4.25	1.00**
CMS-ARG-3A × P69R	4.70**	-0.07	-0.41	-0.41	0.17**	3.84**	5.83**	0.03**	102.33**	-7.49	-1.2	-0.96
CMS-ARG-3A × P124R	0.74**	0.01	-0.11	0.08**	-0.02	-9.16	2.15**	-0.1	-77.55	5.18**	3.39**	-0.82
CMS-ARG-3A × P100R	-3.95	-0.03	0.20**	-0.16	-0.09	10.84**	-8.49	-0.01	-89.96	10.32**	2.06	0.78**
CMS-ARG-6A × RCR-8297	-4.98	-0.13	-0.14	-0.59	0.30**	-1.51	0.17	0.10**	-26.37	2.36**	0.37	-1.48
CMS-ARG-6A × P69R	2.51**	0.04**	-0.07	0.26**	0.02	0.47	1.94**	0.04**	-28.05	2.09**	5.46**	0.06
CMS-ARG-6A × P124R	3.08**	0.10**	0.15**	0.40**	-0.17	2.37**	0.89*	-0.06	67.40**	-3.2	0.99	1.37**
CMS-ARG-6A × P100R	-0.61	-0.01	0.06*	-0.06	-0.15	-1.32	-3	-0.08	-12.98	-1.25	-6.82	0.05
CMS-DV-10A × RCR-8297	0.99**	0.13**	0.30**	0.88**	-0.13	0.52	-0.91	0.03**	10.32	-3.2	1.67	1.73**
CMS-DV-10A × P69R	-1	-0.04	-0.09	-0.29	-0.3	-3.62	-3.53	-0.01	22.15**	2.25**	-4.63	1.11**
CMS-DV-10A × P124R	1.24**	-0.19	-0.49	-1.09	0.22**	7.72**	1.81**	-0.05	-84.67	3.50**	-0.25	-1.62
CMS-DV-10A × P100R	-1.22	0.10**	0.28**	0.50**	0.21**	-4.62	2.62**	0.03**	52.20**	-2.54	3.20**	-1.22
CMS-PHIR-27A × RCR-8297	2.12**	0.12**	0.19**	0.65**	-0.03	-13.56	-1.38	-0.04	-69.28	9.10**	1.71	2.49**
CMS-PHIR-27A × P69R	-3.34	-0.09	-0.08	-0.52	0.08*	-5.39	-0.91	0	-27.13	-1.72	-1.85	-1.34
CMS-PHIR-27A × P124R	-0.79	0.05**	0.12**	0.28**	0.02	18.61**	-1.92	0	59.39**	-3.36	0.3	-1.17
CMS-PHIR-27A × P100R	2.01**	-0.08	-0.22	-0.41	-0.06	0.33	4.21**	0.04**	37.02**	-4.02	-0.15	0.02
CMS-PRUN-29A × RCR-8297	2.34**	0.10**	0.09**	0.55**	0.45**	4.95**	7.50**	-0.1	138.77**	-3.27	6.70**	-0.94
CMS-PRUN-29A × P69R	-0.15	0.08**	0.19**	0.43**	0.16**	5.11**	0.65	-0.05	114.66**	-3.78	-2.56	-0.56
CMS-PRUN-29A × P124R	-0.81	0.10**	0.26**	0.57**	-0.17	-5.7	-5.54	0.14**	-137.47	5.29**	-1.69	-0.54
CMS-PRUN-29A × P100R	-1.38	-0.29	-0.54	-1.55	-0.44	-4.35	-2.61	0.02*	-115.96	1.76**	-2.45	2.03**
CMS-40A × RCR-8297	-3.18	-0.22	-0.39	-1.23	0.15**	-13.19	-0.32	0.02*	-2.8	2.52**	3.55**	1.64**
CMS-40A × P69R	2.48**	0.05**	0.03	0.22**	-0.02	5.70**	1.26**	0.02*	-30.82	1.13*	2.64*	-0.69
CMS-40A × P124R	2.22**	0.08**	0.22**	0.59**	0.07	4.88**	1.26**	-0.02	46.96**	-3.5	-2.84	0.81**
CMS-40A × P100R	-1.52	0.09**	0.13**	0.42**	-0.2	2.61**	-2.2	-0.02	-13.33	-0.15	-3.35	-1.76
CMS-42A × RCR-8297	-1.8	-0.07	0.02	-0.34	-0.12	5.12**	-1.07	0	28.86**	-4.69	-6.32	0.43**
CMS-42A × P69R	2.16**	0.05**	-0.04	0.22**	0.26**	-3.85	0.16	-0.02	-33.49	3.87**	6.42**	0.21
CMS-42A × P124R	-0.91	0.05**	0.09**	0.23**	-0.15	3.27**	1.21**	-0.03	16.38**	-0.52	0.48	-0.02
CMS-42A × P100R	0.56*	-0.02	-0.07	-0.11	0.01	-4.54	-0.3	0.04**	-11.75	1.33**	-0.59	-0.62
CMS-234A × RCR-8297	2.02**	-0.29	-0.55	-1.64	-0.01	5.94**	-1.37	-0.07	-97.12	4.10**	-5.86	-0.69
CMS-234A × P69R	-1.02	0.10**	0.27**	0.55**	0.20**	2.96**	-0.16	0.06**	302.53**	-6.69	16.81**	2.00**
CMS-234A × P124R	-2.59	-0.15	-0.17	-0.8	-0.17	-7.08	-2.21	0.04**	-137.52	0.18	-12.45	-1.07
CMS-234A × P100R	1.59**	0.34**	0.44**	1.90**	-0.02	-1.82	3.74**	-0.04	-67.9	2.42**	1.5	-0.23
CMS-38A × RCR-8297	4.65**	0.19**	0.15**	1.09**	0.40**	-0.45	3.95**	-0.02	98.05**	-4.27	7.67**	-0.04
CMS-38A × P69R	-3.15	-0.03	0.10**	-0.1	-0.27	1.96**	-7.52	0.08**	-77.64	3.91**	-0.67	-3.34
CMS-38A × P124R	-4.01	-0.12	-0.04	-0.62	0.27**	-6.08	6.43**	-0.02	31.65**	3.84**	11.60**	2.07**
CMS-38A × P100R	2.51**	-0.04	-0.21	-0.37	-0.39	4.56**	-2.85	-0.04	-52.06	-3.48	-18.6	1.31**
NC-41B (C) × RCR-8297	-3.3	-0.02	0.10**	-0.13	-0.53	2.22**	-1.41	-0.11	-51.58	-4.47	-7.33	2.08**
NC-41B (C) × P69R	2.11**	-0.05	-0.13	-0.25	-0.08	-9.69	0.94*	0.01	-211.09	14.11**	3.03**	-0.06
NC-41B (C) × P124R	0.3	-0.1	-0.27	-0.53	0.34**	5.38**	0.37	0.09**	29.77**	-0.49	2.87**	-1.4
NC-41B (C) × P100R	0.89**	0.16**	0.30**	0.91**	0.27**	2.09**	0.1	0	232.90**	-9.15	1.43	-0.62
42B × RCR-8297	0.04	0.01	0.03	0.04	-0.1	0.25	-2.97	0.20**	37.72**	-2.94	-2.64	-1.62
42B × P69R	-1.97	-0.12	-0.15	-0.67	0.33**	-0.55	2.16	-0.11	38.20**	0.01	8.14**	0.93**
42B × P124R	1.07**	0.19**	0.31**	1.04**	-0.29	-4.34	0.05	-0.03	-39.02	-2.46	-11.61	0.2
42B × P100R	0.85**	-0.08	-0.19	-0.41	0.06	4.65**	0.75	-0.06	-36.9	5.39**	6.11**	0.49**
SCA Under Stressed Enviorment
CMS-XA × RCR-8297	1.84**	-0.04	-0.18	-0.29	0.35**	-2.43	-0.3	-0.34	-33.14	7.94**	7.46**	0.02
CMS-XA × P69R	-1.13	0.03**	0.13**	0.15*	-0.13	2.80**	-1.95	0.60**	-82.7	-2.81	-15.76	0.23*
CMS-XA × P124R	0.99*	0.15**	0.27**	0.87**	-0.15	7.68**	1.66**	-0.48	58.67**	-4.04	2.37*	-1.58
CMS-XA × P100R	-1.71	-0.15	-0.22	-0.74	-0.07	-8.06	0.6	0.22**	57.17**	-1.09	5.93**	1.34**
CMS-E002-91A × RCR-8297	2.39**	0	-0.15	-0.1	-0.12	-16.31	-0.95	0.23**	-26.12	8.73**	11.52**	-1.62
CMS-E002-91A × P69R	0.69	0.14**	0.20**	0.76**	0.02	7.54**	-2.33	-0.38	30.81**	-4.57	-4.72	-0.35
CMS-E002-91A × P124R	-0.5	-0.02	-0.02	-0.08	0.30**	7.08**	0.43	-0.12	-22.56	3.26**	5.88**	1.62**
CMS-E002-91A × P100R	-2.57	-0.12	-0.04	-0.58	-0.21	1.69**	2.85**	0.27**	17.87*	-7.43	-12.69	0.35**
CMS-PKU-2A × RCR-8297	0.39	0.01	-0.08	-0.02	-0.13	-14.16	1.11**	-0.17	62.61**	-7.62	-0.64	-1.49
CMS-PKU-2A × P69R	0.56	-0.03	-0.13	-0.22	-0.07	-0.95	0.3	-0.14	-23.04	-1.37	-4.41	-0.47
CMS-PKU-2A × P124R	-1.42	-0.04	0.07*	-0.17	0.16**	7.98**	-1.21	0.23**	-15.91	6.00**	7.46**	-1.83
CMS-PKU-2A × P100R	0.47	0.06**	0.15**	0.41**	0.04*	7.13**	-0.2	0.08**	-23.65	2.98**	-2.4	3.79**
CMS-ARG-2A × RCR-8297	1.01**	0.38**	0.82**	2.01**	-0.44	10.95**	1.26**	-0.03	26.28**	-0.59	1.38	-1.61
CMS-ARG-2A × P69R	-2.78	-0.13	-0.22	-0.75	-0.34	8.84**	0.62	-0.18	-1.86	-5.1	-4.51	-1.85
CMS-ARG-2A × P124R	1.75**	-0.06	-0.19	-0.29	0.74**	-12.95	-0.62	0.38**	-71.45	1.02	-7.57	-0.95
CMS-ARG-2A × P100R	0.01	-0.19	-0.42	-0.97	0.04*	-6.84	-1.26**	-0.18	47.03**	4.68**	10.70**	4.41**
CMS-ARG-3A × RCR-8297	1.45**	0.08**	0.10**	0.34**	0.51**	-0.88	-1.03	0.22**	20.18*	-1.98	4.46**	0.57**
CMS-ARG-3A × P69R	0.43	-0.06	-0.13	-0.34	-0.21	-14.77	-1.03	0.17**	-1.53	-0.73	-5.36	-0.34
CMS-ARG-3A × P124R	0.97*	0.01	-0.02	0.14*	-0.35	10.06**	0.4	-0.31	-24.24	4.42**	3.52**	-0.1
CMS-ARG-3A × P100R	-2.85	-0.03	0.06*	-0.13	0.05**	5.59**	1.66**	-0.07	5.59	-1.71	-2.62	-0.13
CMS-ARG-6A × RCR-8297	-5.78	-0.18	-0.22	-0.82	-0.36	-1.9	-1.09	0.51**	-125.69	8.36**	-3.16	0.37**
CMS-ARG-6A × P69R	0.80*	0.04**	-0.03	0.05	0.31**	5.08**	-0.02	-0.3	-21	-0.38	4.99**	-0.76
CMS-ARG-6A × P124R	2.65**	0.07**	0.02	0.40**	0.13*	-4.06	1.65**	-0.02	184.79**	-7.1	4.77**	1.92**
CMS-ARG-6A × P100R	2.33**	0.07**	0.23**	0.36**	-0.07	0.88	-0.55	-0.19	-38.11	-0.88	-6.6	-1.53
CMS-DV-10A × RCR-8297	5.07**	0.14**	0.11**	0.69**	0.24**	9.37**	-0.45	0.10**	52.39**	-7.91	-4.62	-1.66
CMS-DV-10A × P69R	-1.69	-0.01	0.02	-0.11	-0.23	-0.68	0.66	0.04**	-107.34	5.88**	-1.99	0.91**
CMS-DV-10A × P124R	-1.41	-0.17	-0.41	-0.86	0.16**	-14.4	0.64	-0.14	44.79**	0.04	-1.29	-0.17
CMS-DV-10A × P100R	-1.97	0.04**	0.28**	0.28**	-0.16	5.72**	-0.86	0	10.17	1.99**	7.90**	0.92**
CMS-PHIR-27A × RCR-8297	0.3	0.05**	0.12**	0.22**	0.32**	1.91**	-0.71	-0.21	-16.83	2.47**	-2.2	-0.37
CMS-PHIR-27A × P69R	0.37	-0.03	-0.12	-0.22	-0.43	4.42**	-0.09	0.06**	-57.48	0.99	-0.94	0.70**
CMS-PHIR-27A × P124R	-1.18	0.03**	0.13**	0.23**	-0.13	-1.24	-0.39	-0.02	0.65	-1.43	-5.52	-1.02
CMS-PHIR-27A × P100R	0.51	-0.05	-0.13	-0.22	0.24**	-5.09	1.18**	0.17**	73.67**	-2.03	8.65**	0.69**
CMS-PRUN-29A × RCR-8297	-2.94	0.06**	0.32**	0.23**	0.13**	-1.54	0.91*	-0.35	-37.75	1.70*	2.83**	-0.05
CMS-PRUN-29A × P69R	2.44**	0.11**	0.07*	0.59**	0.36**	-11.65	2.29**	-0.1	201.10**	-1.38	8.21**	-2.03*
CMS-PRUN-29A × P124R	0.47	0.03**	0.08**	0.24**	-0.1	1.06*	-3.29	0.38**	-112.19	1.47*	-6.94	0.30*
CMS-PRUN-29A × P100R	0.03	-0.2	-0.47	-1.05	-0.39	12.12**	0.08	0.06**	-51.17	-1.79	-4.09	1.77**
CMS-40A × RCR-8297	-1.64	-0.26	-0.56	-1.35	-0.14	-10.35	-2.33	0.19**	8.06	-0.34	-11.15	1.92**
CMS-40A × P69R	-0.45	0.02*	0.12**	-0.06	0.09**	7.52**	-0.2	-0.14	-59.92	0.91	3.71**	-0.69
CMS-40A × P124R	1.01**	0.08**	0.22**	0.51**	0.29**	-1.09	0.79	0.03**	150.29**	-4.1	8.84**	0.60**
CMS-40A × P100R	1.08**	0.15**	0.22**	0.90**	-0.24	3.92**	1.74**	-0.08	-98.44	3.53**	-1.4	-1.83
CMS-42A × RCR-8297	1.33**	-0.12	-0.26	-0.76	-0.17	1.66**	-2.72	0.01	24.98**	-1.84	-0.47	-0.25
CMS-42A × P69R	0.05	-0.08	-0.2	-0.47	0.29**	-7.91	2.44**	-0.03	4.33	1.93**	8.01**	1.38**
CMS-42A × P124R	0.21	0.15**	0.28**	0.92**	-0.38	11.99**	0.26	-0.14	-0.96	-1.24	-1.87	-1.37
CMS-42A × P100R	-1.6	0.04**	0.17**	0.31**	0.27**	-5.74	0.02	0.16**	-28.36	1.15	-5.67	0.24*
CMS-234A × RCR-8297	-6.04	-0.23	-0.28	-1.35	-0.27	17.21**	-0.73	-0.35	-78.63	1.03	-2.45	1.69**
CMS-234A × P69R	3.30**	0.04**	0	0.17*	0.21**	-0.69	2.59**	0.29**	237.06**	-3.8	4.17**	-0.5
CMS-234A × P124R	0.57	-0.12	-0.18	-0.61	0.06**	-3.19	-0.34	0.16**	-156.4	1.96**	-9.6	-1.47
CMS-234A × P100R	2.17**	0.31**	0.45**	1.79**	-0.01	-13.34	-1.52	-0.1	-2.03	0.81	7.87**	0.28*
CMS-38A × RCR-8297	1.79**	0.15**	0.30**	1.13**	0.28**	-6.29	7.14**	-0.09	58.42**	-3.32	1.18	0.49**
CMS-38A × P69R	-3.53	-0.06	0.09**	0.06	-0.13	3.83**	-1.09	0.29**	-101.23	5.45**	0.19	0.93**
CMS-38A × P124R	1.42**	-0.17	-0.25	-0.47	0.04*	15.26**	-2.11	-0.11	59.65**	-0.78	5.88**	-1.01
CMS-38A × P100R	0.32	0.08**	-0.14	-0.72	-0.2	-12.8	-3.93	-0.1	-16.83	-1.35	-7.25	-0.41
NC-41B (C) × RCR-8297	-0.23	-0.03	-0.14	-0.26	-0.14	6.89**	2.33**	-0.35	0.9	-0.35	3.03**	3.32**
NC-41B (C) × P69R	0.2	-0.03	0.05	-0.2	-0.07	-3.95	-2.36	0.12**	-130.58	3.63**	-3.21	2.76**
NC-41B (C) × P124R	-2.97	-0.07	-0.03	-0.33	-0.41	-10.56	1.73**	0.25**	52.63**	-1.57	2.44*	3.80**
NC-41B (C) × P100R	3.00**	0.13**	0.11**	0.80**	0.62**	7.63**	-1.7	-0.03	77.06**	-1.7	-2.27*	-9.88
42B × RCR-8297	1.06**	0	0.09**	0.34**	-0.07	5.86**	-2.42	0.62**	64.35**	-6.29	-7.17	-1.33
42B × P69R	0.75	0.04**	0.15**	0.60**	0.33**	0.57	0.16	-0.32	113.38**	1.36	11.60**	0.08
42B × P124R	-2.57	0.12**	0.01	-0.5	-0.34	-13.62	0.39	-0.1	-147.75	2.09**	-8.36	1.25**
42B × P100R	0.76	-0.17	-0.26	-0.44	0.09**	7.20**	1.88**	-0.2	-29.98	2.83**	3.93**	0.01
** represents p < 0.01
